# Supplementary material for: A near-infrared light-responsive nanocomposite for photothermal release of H2S and suppression of cell viability
Source: Royal Society of Chemistry journal article supplement (doi:10.1039/c9tb01611b), 2019-01-01
Supplement: c9tb01611b1.pdf [file c9tb01611b1.pdf]

## Supporting information

### **Near-infrared light-responsive nanocomposite for photothermal release of H<sub>2</sub>S and suppression of cell viability**

Haifeng Li,<sup>a</sup> Yu Yao,<sup>a</sup> Hui Shi,<sup>a</sup> Yanli Lei,<sup>b</sup> Yan Huang,<sup>a</sup> Kemin Wang,<sup>a</sup> Xiaoxiao He<sup>a\*</sup> and Jianbo Liu<sup>a\*</sup>

<sup>a</sup> State Key Laboratory of Chemo/Biosensing and Chemometrics, College of Biology, College of Chemistry and Chemical Engineering, Key Laboratory for Bio-Nanotechnology and Molecular Engineering of Hunan Province, Hunan University, Changsha 410082 (China)

<sup>b</sup> School of Chemistry and Food Engineering, Changsha University of Science and Technology, Changsha 410114, China.

\*Address correspondence to these authors at: State Key Laboratory for Chemo/Biosensing and Chemometrics, College of Biology, College of Chemistry and Chemical Engineering, Hunan University, Changsha, 410082, P. R. China. E-mail: xiaoxiaohe@hnu.edu.cn, liujianbo@hnu.edu.cn; Fax/Tel: +86 731 88821566.

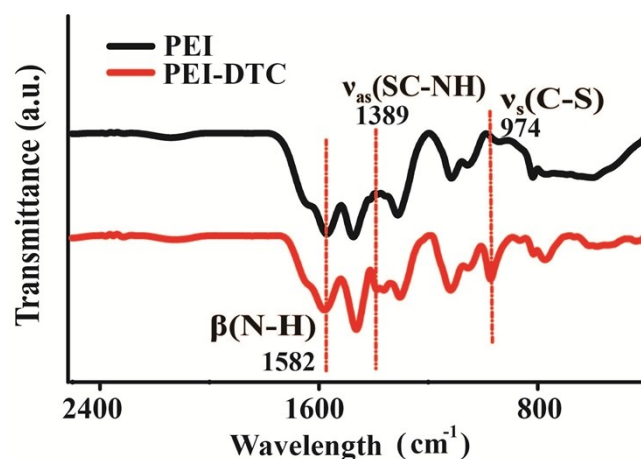

**Figure S1.** FTIR spectra of PEI and PEI-DTC powders. In comparison with polymer PEI, new FTIR peaks at  $1389\text{ cm}^{-1}$  and  $974\text{ cm}^{-1}$  can be noticed for PEI-DTC, which are attributed to the asymmetric stretching vibration of CS-NH and the symmetric stretching vibration of C-S in dithiocarbamate, respectively.

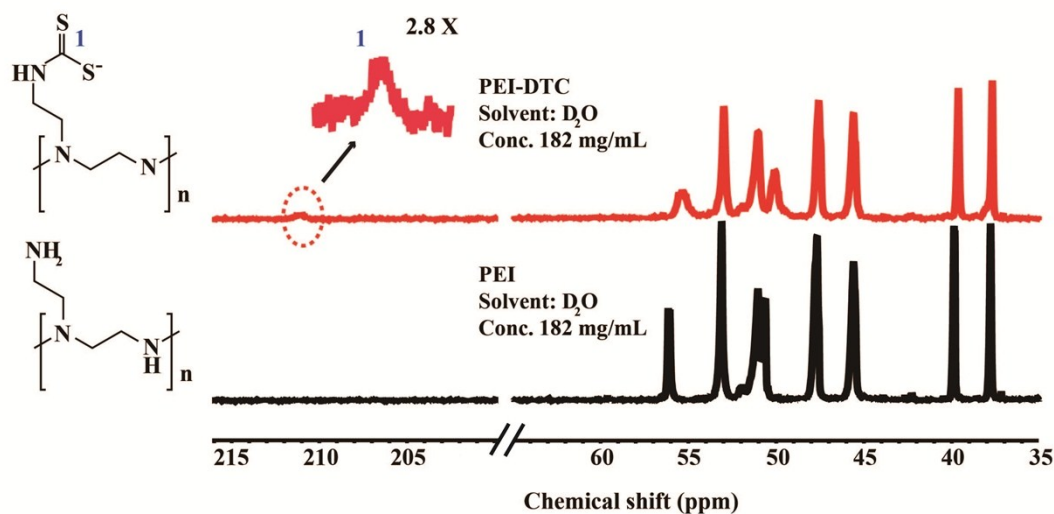

**Figure S2.**  $^{13}\text{C}$  NMR spectra of PEI and PEI-DTC. The structure of the polymer PEI and the newly synthesized PEI-DTC was characterized by  $^{13}\text{C}$  NMR. A new peak at  $211.0\text{ ppm}$  emerged for polymer PEI-DTC, which might be caused by carbon in the dithiocarbamate ester of PEI-DTC, generated from the condensation reaction of dithiocarbamate between  $\text{CS}_2$  and the amine group in the PEI polymer. This further confirms the successful synthesis of the polymer PEI-DTC.

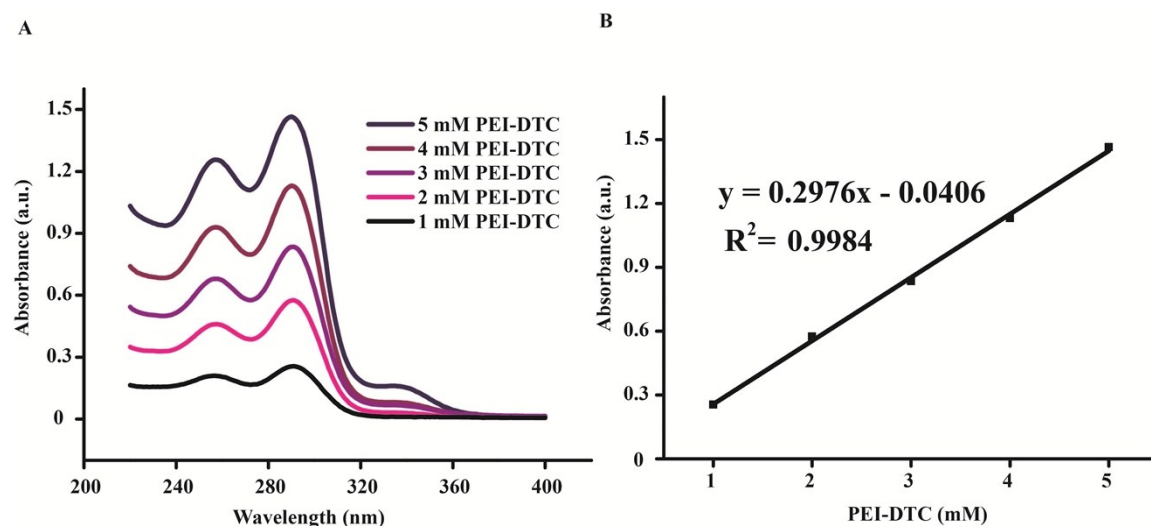

**Figure S3.** (A) UV-vis adsorption, and (B) standard curve for colorimetric assay of  $\text{H}_2\text{S}$  generated from thermal degradation of PEI-DTC. The qualification of PEI-DTC was based on the characteristic adsorption peak at 290 nm.

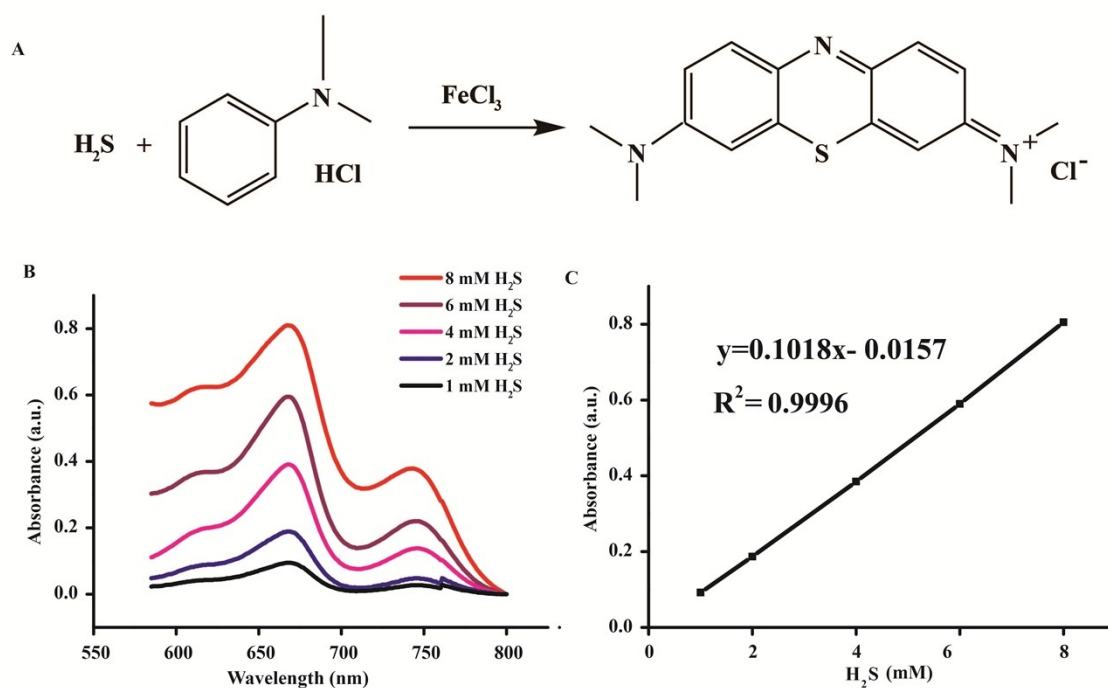

**Figure S4.** (A) The mechanism illustration of the methylene blue colorimetric assay for  $\text{H}_2\text{S}$  determination. (B) UV-vis adsorption spectra, and (C) standard curve for colorimetric assay of  $\text{H}_2\text{S}$  made from different concentrations of  $\text{H}_2\text{S}$ . The qualification of  $\text{H}_2\text{S}$  was based on the characteristic adsorption peak at 670 nm.

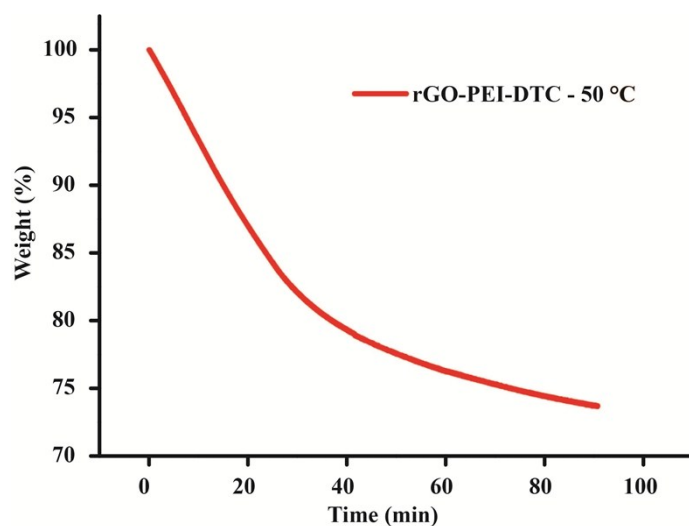

**Figure S5.** Time dependent thermogravimetric analysis of rGO-PEI-DTC nanocomposites ( $0.25 \text{ mg} \cdot \text{mL}^{-1}$ ) under  $50^\circ\text{C}$ .

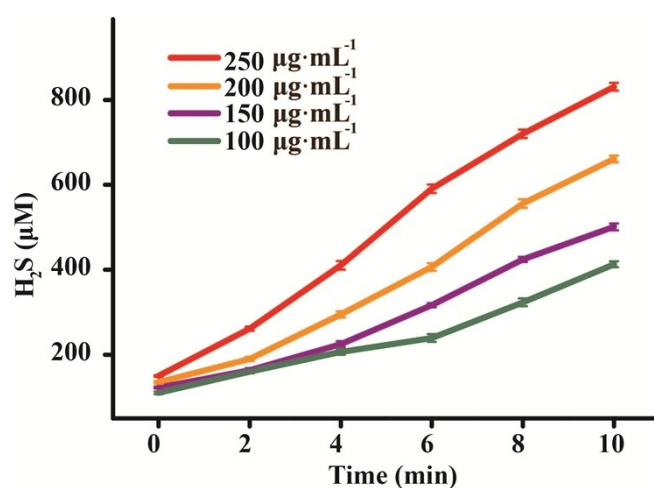

**Figure S6.** Time-dependent  $\text{H}_2\text{S}$  generation from different nanocomposites ( $100\text{-}250 \text{ } \mu\text{g} \cdot \text{mL}^{-1}$ ) under NIR light irradiation. Laser power:  $3.0 \text{ W} \cdot \text{cm}^{-2}$  at  $780 \text{ nm}$ .

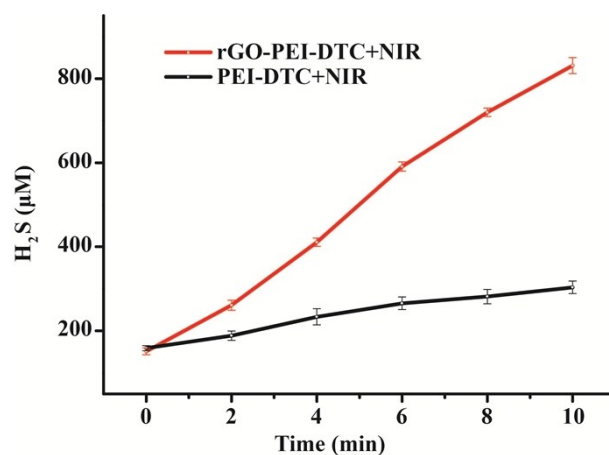

**Figure S7.** Time-dependent  $\text{H}_2\text{S}$  generation from rGO-PEI-DTC nanocomposites ( $250 \mu\text{g}\cdot\text{mL}^{-1}$ ) and PEI-DTC ( $158 \mu\text{g}\cdot\text{mL}^{-1}$ ) under laser illumination ( $3.0 \text{ W}\cdot\text{cm}^{-2}$  at  $780 \text{ nm}$ ).

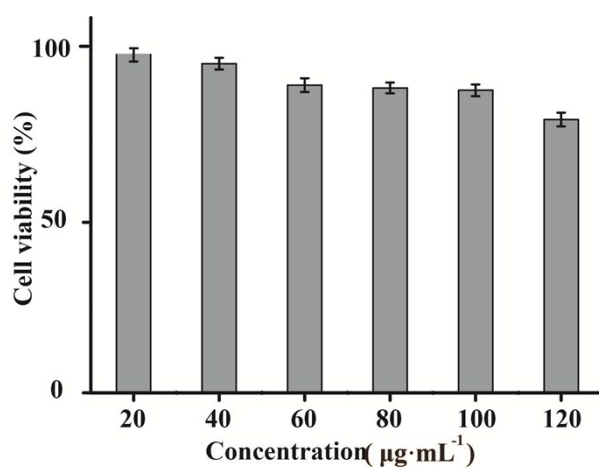

**Figure S8.** Relative cell viabilities of MCF-7 cells treatment with rGO-PEI-DTC nanocomposites at different concentrations. The cell viabilities were determined through MTS experiments.

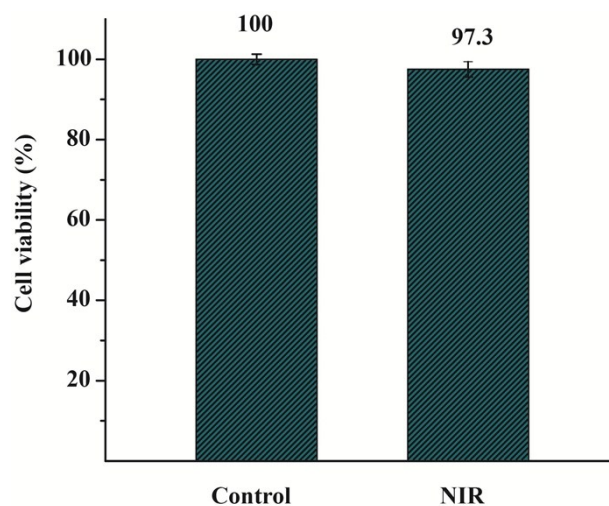

**Figure S9.** The MTS cell viability assay, Cells were treated under NIR irradiation (780 nm at 2.0 W·cm<sup>-2</sup>, for 10 min).

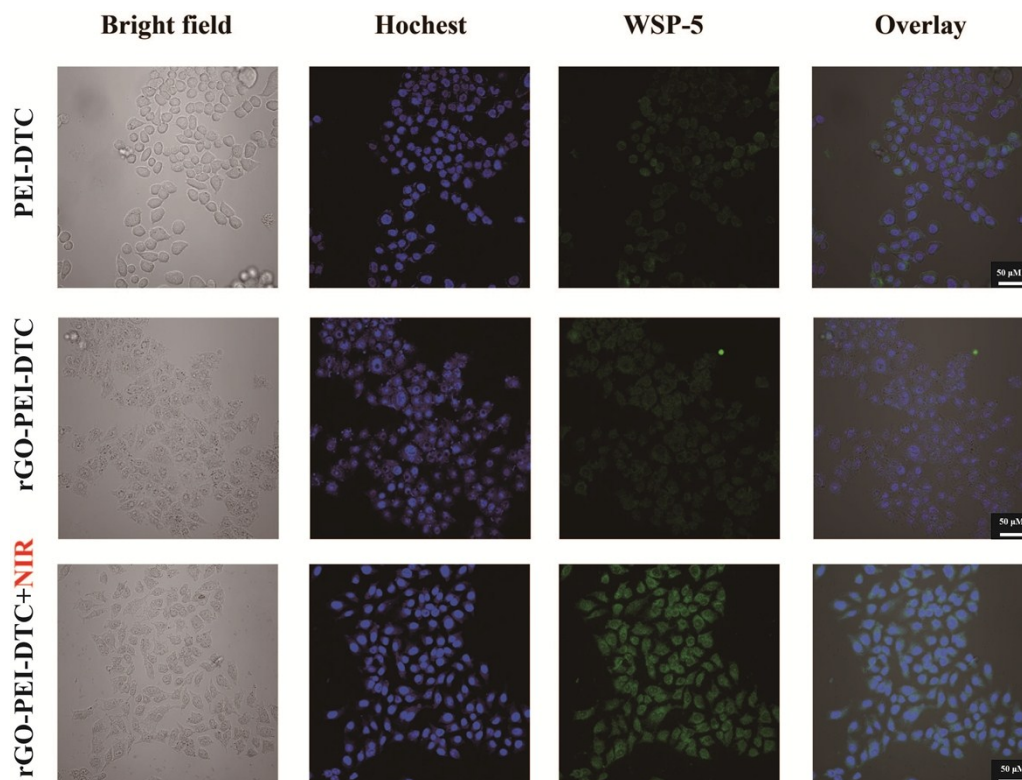

**Figure S10.** The CLSM images of cells treated with different nanocomposite sample, NIR laser irradiation (780 nm at 2.0 W·cm<sup>-2</sup>, 10 min). Scale bar: 50 μm. H<sub>2</sub>S fluorescence probe (WSP-5) was used to determine the intracellular production of H<sub>2</sub>S by NIR irradiation of rGO-PEI-DTC nanocomposite. The polymer donor PEI-DTC, rGO nanosheets and NIR illumination are three necessary conditions for the photothermal generation of H<sub>2</sub>S. The absence of any of the three conditions will result in the failure or inefficiency production of H<sub>2</sub>S. rGO nanosheets nanocomplex loaded with the polymer PEI-DTC can generate H<sub>2</sub>S by NIR irradiation, which is

much higher than the case with the polymer PEI-DTC alone.

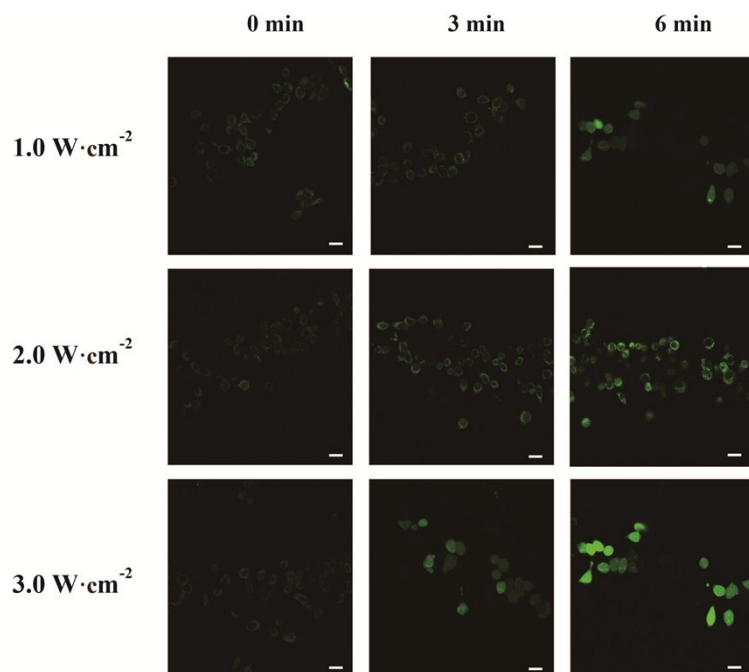

**Figure S11.** The CLSM images of MCF-7 cells treatment with rGO-PEI-DTC ( $0.10 \text{ mg}\cdot\text{mL}^{-1}$ ) and NIR light irradiation for 0-6 min at different laser irradiation ( $1.0\text{-}3.0 \text{ W}\cdot\text{cm}^{-2}$ ). Scale bar:  $20 \text{ }\mu\text{m}$ .  $\text{H}_2\text{S}$  fluorescence probe (WSP-5) was used to determine the intracellular production of  $\text{H}_2\text{S}$  by NIR light irradiation of rGO-PEI-DTC nanocomposites. The illumination time and laser power of rGO-PEI-DTC nanocomposites are the determinants of  $\text{H}_2\text{S}$  production.

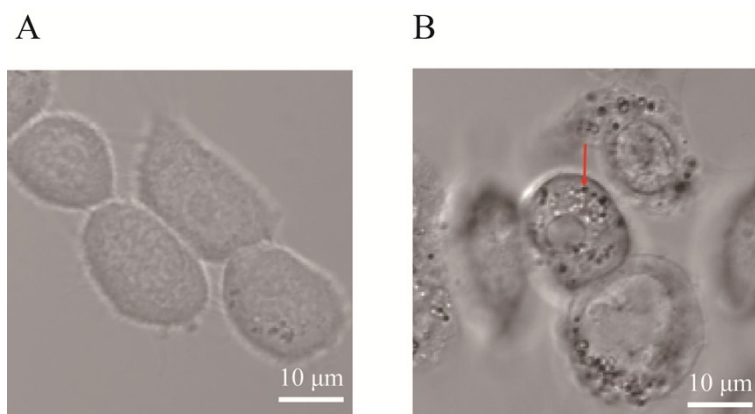

**Figure S12.** The microscopic images of cells before (A) and after (B) incubation with rGO-PEI-DTC nanocomposites for 4 h.
